# Supplementary material
Source: ML conference proceedings conference paper supplement (https://www.ecva.net/papers/eccv_2020/papers_ECCV/html/123530409_ECCV_2020_paper.php)
Supplement: Supplementary file 2 [file 123530409-supp.zip]

Archive with 3 entries (3 files):
- 0600-supp/2020ECCV_Asynchronous_Sparse_Convolutions_Supp.pdf
- 0600-supp/2020ECCV_Asynchronous_Sparse_Convolutions_Video.mp4
- 0600-supp/README.txt.txt
