# Supplementary material
Source: ML conference proceedings conference paper supplement (https://www.ecva.net/papers/eccv_2020/papers_ECCV/html/123530409_ECCV_2020_paper.php)
Supplement: Supplementary file 2 [file 123530409-supp.zip › 0600-supp/README.txt.txt]

Video Codec: H264 - MPEG-4 AVC (part 10) (avc1)
